# Supplementary material for: The first ternary Nd-MOF/GO/Fe3O4 nanocomposite exhibiting an excellent photocatalytic performance for dye degradation
Source: Royal Society of Chemistry journal article supplement (doi:10.1039/d0dt01648a), 2020-01-01
Supplement: d0dt01648a1.pdf [file d0dt01648a1.pdf]

## Electronic Supplementary Information

# The first ternary Nd-MOF/GO/Fe<sub>3</sub>O<sub>4</sub> nanocomposite exhibiting excellent photocatalytic performance for dye degradation

*Yu-ting Bai,<sup>a</sup> Shuo Zhang,<sup>a</sup> Si-si Feng,<sup>\*b,c</sup> Miao-li Zhu<sup>\*a,b</sup> and Shengqian Ma<sup>\*c</sup>*

<sup>a</sup>Institute of Molecular Science, Key Laboratory of Chemical Biology and Molecular Engineering of the Education Ministry, Shanxi University, Taiyuan, Shanxi 030006, P. R. China.

<sup>b</sup>Key Laboratory of Materials for Energy Conversion and Storage of Shanxi Province; Shanxi University, Taiyuan, Shanxi, 030006, P. R. China.

<sup>c</sup>Department of Chemistry, University of South Florida, 4202 Easter Fowler Avenue, Tampa, Florida 33620, United States

---

\* Corresponding Authors.

E-mail addresses: [ssfeng@sxu.edu.cn](mailto:ssfeng@sxu.edu.cn) (S. Feng), [miaoli@sxu.edu.cn](mailto:miaoli@sxu.edu.cn) (M. Zhu), [sqma@usf.edu](mailto:sqma@usf.edu) (S. Ma).

Tel: ++86-351-7017974;

Fax: ++86-351-7011022.

**Table S1. Selected bond lengths (Å) and angles (°) for MOF-1.**

|                                         |             |                                         |             |                                       |             |
|-----------------------------------------|-------------|-----------------------------------------|-------------|---------------------------------------|-------------|
| Nd1—O6 <sup>i</sup>                     | 2.328 (3)   | Nd1—O9 <sup>iv</sup>                    | 2.453 (3)   | Nd1—O4                                | 2.536 (3)   |
| Nd1—O5 <sup>ii</sup>                    | 2.382 (3)   | Nd1—O10                                 | 2.458 (7)   | Nd1—O11                               | 2.537 (6)   |
| Nd1—O7 <sup>iii</sup>                   | 2.409 (3)   | Nd1—O4 <sup>v</sup>                     | 2.473 (3)   | Nd1—O8 <sup>iv</sup>                  | 2.646 (3)   |
| O6 <sup>i</sup> —Nd1—O5 <sup>ii</sup>   | 165.26 (11) | O6 <sup>i</sup> —Nd1—O9 <sup>iv</sup>   | 121.43(12)  | O6 <sup>i</sup> —Nd1—O10              | 106.01 (19) |
| O6 <sup>i</sup> —Nd1—O7 <sup>iii</sup>  | 89.86 (10)  | O5 <sup>ii</sup> —Nd1—O9 <sup>iv</sup>  | 71.43 (11)  | O5 <sup>ii</sup> —Nd1—O10             | 85.51 (18)  |
| O5 <sup>ii</sup> —Nd1—O7 <sup>iii</sup> | 85.25 (10)  | O7 <sup>iii</sup> —Nd1—O9 <sup>iv</sup> | 131.44 (15) | O7 <sup>iii</sup> —Nd1—O10            | 70.82 (17)  |
| O9 <sup>iv</sup> —Nd1—O10               | 65.5 (2)    | O7 <sup>iii</sup> —Nd1—O4 <sup>v</sup>  | 139.65 (9)  | O5 <sup>ii</sup> —Nd1—O4              | 82.39 (9)   |
| O6 <sup>i</sup> —Nd1—O4 <sup>v</sup>    | 84.42 (10)  | O9 <sup>iv</sup> —Nd1—O4 <sup>v</sup>   | 83.84 (15)  | O7 <sup>iii</sup> —Nd1—O4             | 73.92 (9)   |
| O5 <sup>ii</sup> —Nd1—O4 <sup>v</sup>   | 90.32 (9)   | O6 <sup>i</sup> —Nd1—O4                 | 82.90 (10)  | O9 <sup>iv</sup> —Nd1—O4              | 139.64 (14) |
| O10—Nd1—O4                              | 143.48 (17) | O5 <sup>ii</sup> —Nd1—O11               | 112.85 (19) | O4 <sup>v</sup> —Nd1—O11              | 146.95 (17) |
| O4 <sup>v</sup> —Nd1—O4                 | 65.75 (10)  | O7 <sup>iii</sup> —Nd1—O11              | 68.59 (17)  | O4—Nd1—O11                            | 137.57 (17) |
| O6 <sup>i</sup> —Nd1—O11                | 77.95 (19)  | O9 <sup>iv</sup> —Nd1—O11               | 81.9 (2)    | O6 <sup>i</sup> —Nd1—O8 <sup>iv</sup> | 71.63 (11)  |
| O5 <sup>ii</sup> —Nd1—O8 <sup>iv</sup>  | 120.90 (10) | O9 <sup>iv</sup> —Nd1—O8 <sup>iv</sup>  | 49.81 (12)  | O4—Nd1—O8 <sup>iv</sup>               | 138.21 (11) |
| O7 <sup>iii</sup> —Nd1—O8 <sup>iv</sup> | 136.37 (11) | O4 <sup>v</sup> —Nd1—O8 <sup>iv</sup>   | 79.00 (11)  | O11—Nd1—O8 <sup>iv</sup>              | 69.03 (18)  |

Symmetry codes: (i)  $-x+1, -y+1, -z+2$ ; (ii)  $-x+1, -y+1, -z+1$ ; (iii)  $-x, -y+1, -z+2$ ; (iv)  $x+1, y+1, z-1$ ; (v)  $-x+2, -y+1, -z+1$ ; (vi)  $x-1, y-1, z+1$ .

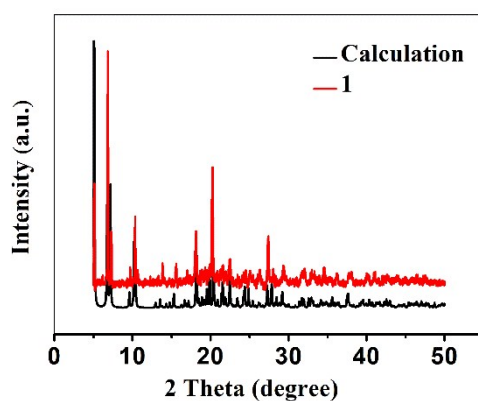**Fig. S1** The PXR D patterns of MOF-1 (calculation and experiment) at room temperature.

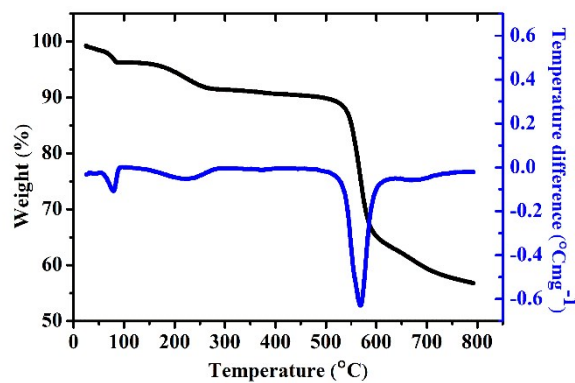

Fig. S2 TGA and DTA plots of MOF-1.

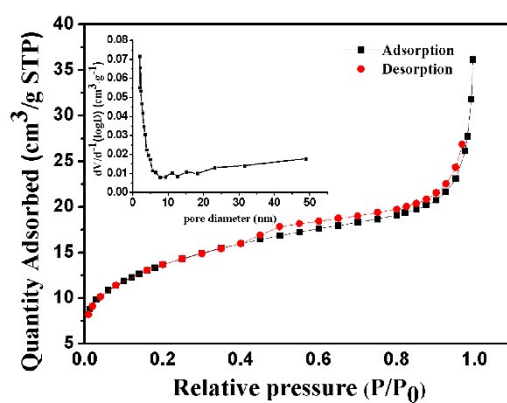

Fig. S3 N<sub>2</sub> adsorption-desorption isotherms and pore-size distribution curve (the inset) of MOF-1/GO/Fe<sub>3</sub>O<sub>4</sub> nanocomposite.

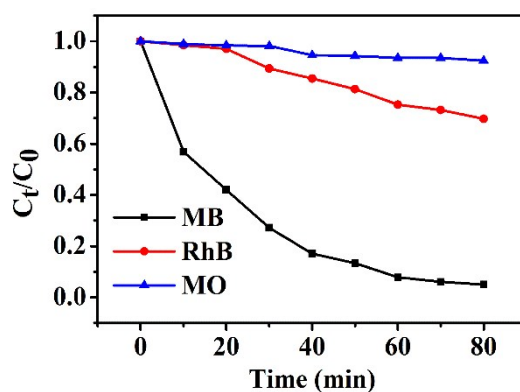

Fig. S4 Photocatalytic degradation of methylene blue (MB), Rhodamine B (RhB), Methyl orange (MO) as a function of irradiation time for MOF-1/GO/Fe<sub>3</sub>O<sub>4</sub>.

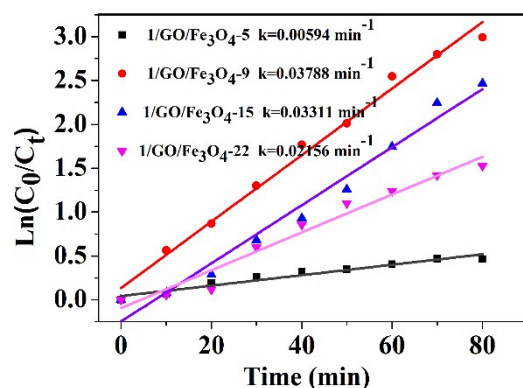

**Fig. S5** First-order kinetics plot for the photodegradation of MB by **MOF-1/GO/Fe<sub>3</sub>O<sub>4</sub>** under the irradiation of visible light.

**Table S2. A summary of recent MOFs-based hybrid nanocomposite photocatalysts for dye degradation**

| Catalysts                                   | Dyes usage (mg) | Catalysts usage (mg) | Dyes usage/ catalysts usage | The rate constants (min <sup>-1</sup> ) | Ref       |
|---------------------------------------------|-----------------|----------------------|-----------------------------|-----------------------------------------|-----------|
| BiVO <sub>4</sub> /MIL-53(Fe)/GO            | 1.5 (RhB)       | 10                   | 15/100                      | 0.01811                                 | 1         |
| M88/GO                                      | 0.5 (RhB)       | 20                   | 2.5/100                     | 0.0645                                  | 2         |
| NH <sub>2</sub> -MIL-53(Al)/RGO             | 2.1 (MB)        | 10                   | 21/100                      | 0.0039                                  | 3         |
| Ag/rGO/MIL-125(Ti)                          | 5 (RhB)         | 40                   | 12.5/100                    | 0.0644                                  | 4         |
| GR/MIL-53(Fe)                               | 0.5 (RhB)       | 10                   | 5/100                       | 0.07772                                 | 5         |
| MIL-53(Fe)-rGO                              | 3 (MB)          | 100                  | 3/100                       | 0.0285                                  | 6         |
| <b>MOF-1/GO/Fe<sub>3</sub>O<sub>4</sub></b> | 0.15 (MB)       | 2                    | 7.5/100                     | 0.03788                                 | This work |

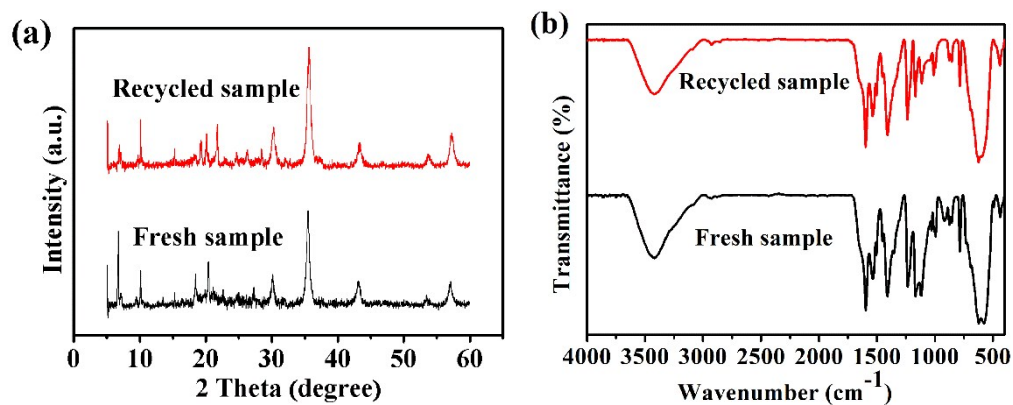

**Fig. S6** PXR patterns (a) and FTIR spectra (b) of **MOF-1/GO/Fe<sub>3</sub>O<sub>4</sub>** before and after the photocatalytic reaction.

**Table S3. The concentration of iron during the reaction**

| pH | iron concentration (mg/L) | MOF-1/GO/Fe <sub>3</sub> O <sub>4</sub> concentration (mg/L) |
|----|---------------------------|--------------------------------------------------------------|
| 3  | 2.166                     | 133                                                          |
| 5  | 0.221                     | 133                                                          |

**(a)**

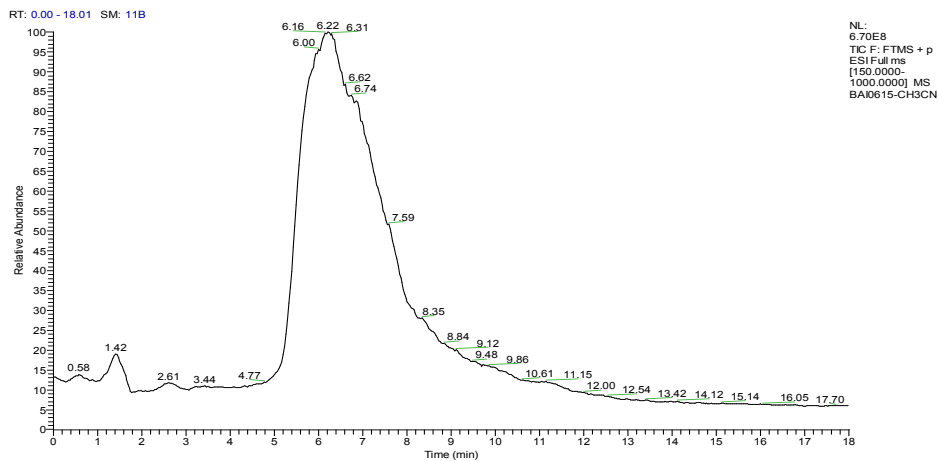

**(b)**

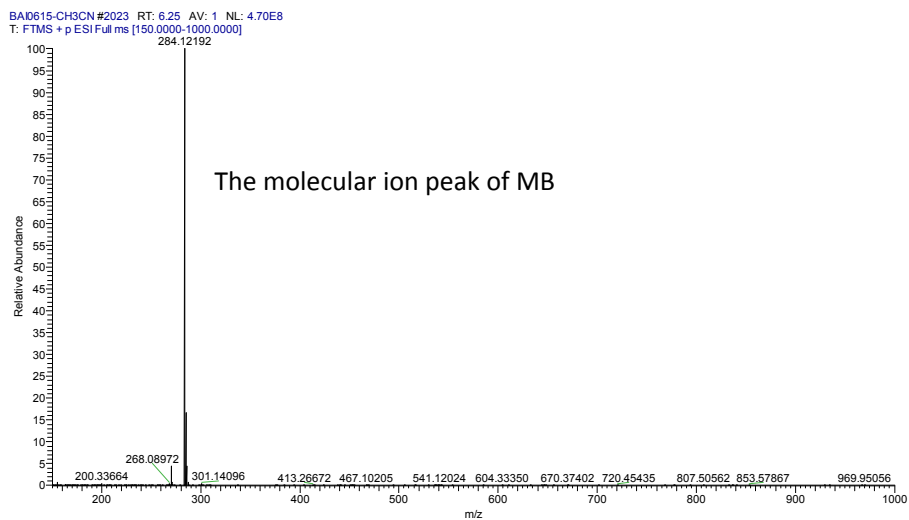

(c)

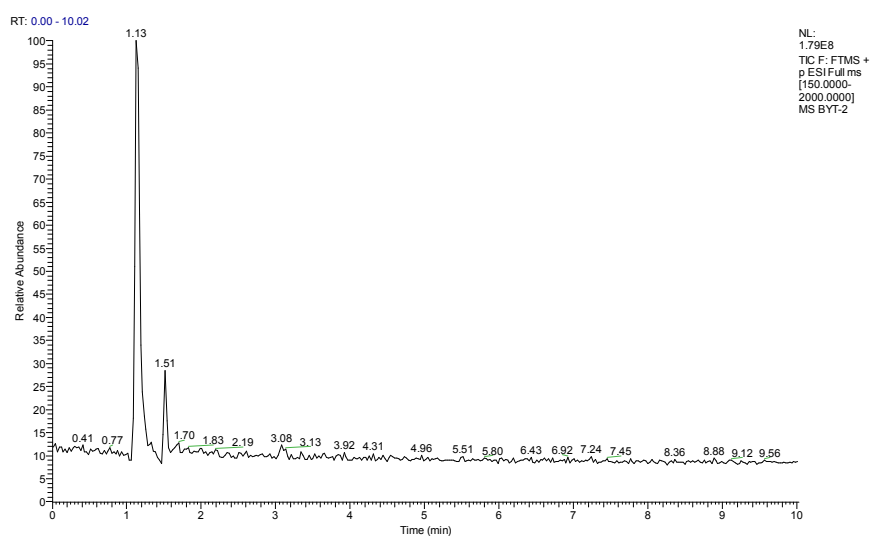

(d)

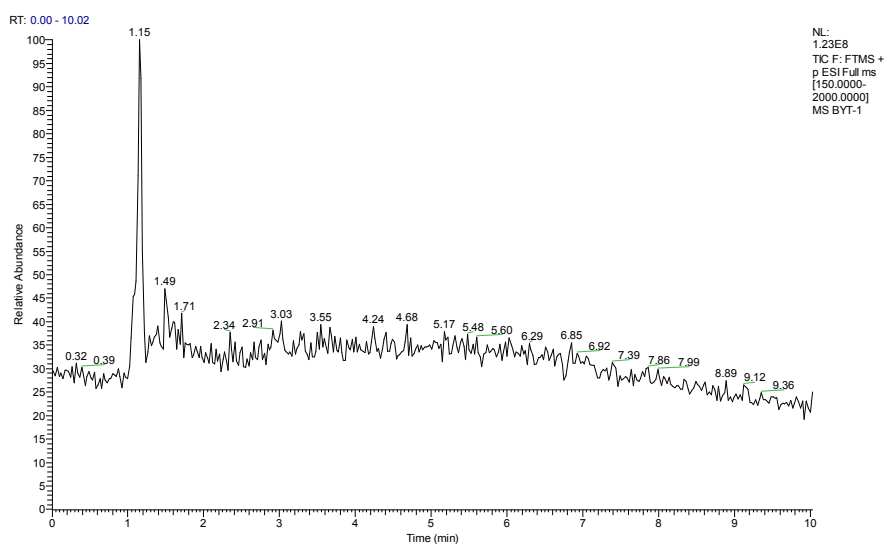

**Fig. S7** Liquid chromatography of MB aqueous solution without the catalyst (a). Mass spectrum corresponding to the MB aqueous solution without the catalyst at a retention time of 6.25 min in liquid chromatography (b). Liquid chromatography after photocatalytic degradation of MB aqueous solution by MOF-1/GO/Fe<sub>3</sub>O<sub>4</sub> (c). Liquid chromatography of distilled water (d).

## References

- S1. Y. Chen, B. Zhai and Y. Liang, *Diam. Relat. Mat.*, 2019, **98**, 107508.
- S2. N. Liu, W. Huang, X. Zhang, L. Tang, L. Wang, Y. Wang and M. Wu, *Appl. Catal. B: Environ*, 2018, **221**, 119-128.
- S3. Y. Yang, W. Wang, H. Li, X. Jin, H. Wang, L. Zhang and Y. Zhang, *Mater. Lett*, 2017, **197**, 17-20.
- S4. X. Yuan, H. Wang, Y. Wu, G. Zeng, X. Chen, L. Leng, Z. Wu and H. Li, *Appl. Organmet. Chem*, 2016, **30**, 289-296.
- S5. C. Zhang, L. Ai and J. Jiang, *Ind. Eng. Chem. Res*, 2014, **54**, 153-163.
- S6. Y. Zhang, G. Li, H. Lu, Q. Lv and Z. Sun, *RSC Adv*, 2014, **4**, 7594.
